# Supplementary material for: Fatty liver and alteration of the gut microbiome induced by diallyl disulfide
Source: PubMed Central journal article supplement — Int J Mol Med. 2019 Sep 24;44(5):1908–20. doi: 10.3892/ijmm.2019.4350 (PMC6777666; doi:10.3892/ijmm.2019.4350), 2019-09-24
Supplement: Supplementary_Data.pdf [file Supplementary_Data.pdf]

Figure S1. Food intake, serum ALT and AST, and hematoxylin and eosin staining of the intestine of the 6 groups of mice. (A) Food intake. (B) Serum ALT and (C) serum AST. (D) Hematoxylin and eosin staining of the intestines of the six groups. Scale bar, 80  $\mu$ m. NFD-CON control mice fed with NFD; NFD-AL, mice fed with NFD and treated with a low dose of DADS; NFD-AH mice fed with NFD and treated with a high dose of DADS; HFD-CON, control mice fed with HFD; HFD-AL, mice fed with HFD and treated with a low dose of DADS; HFD-AH, mice fed with HFD and treated with a high dose of DADS. NFD, normal food diet; HFD, high fat diet; DADS, diallyl disulfide; ALT, alanine aminotransferase; AST, aspartate aminotransferase.

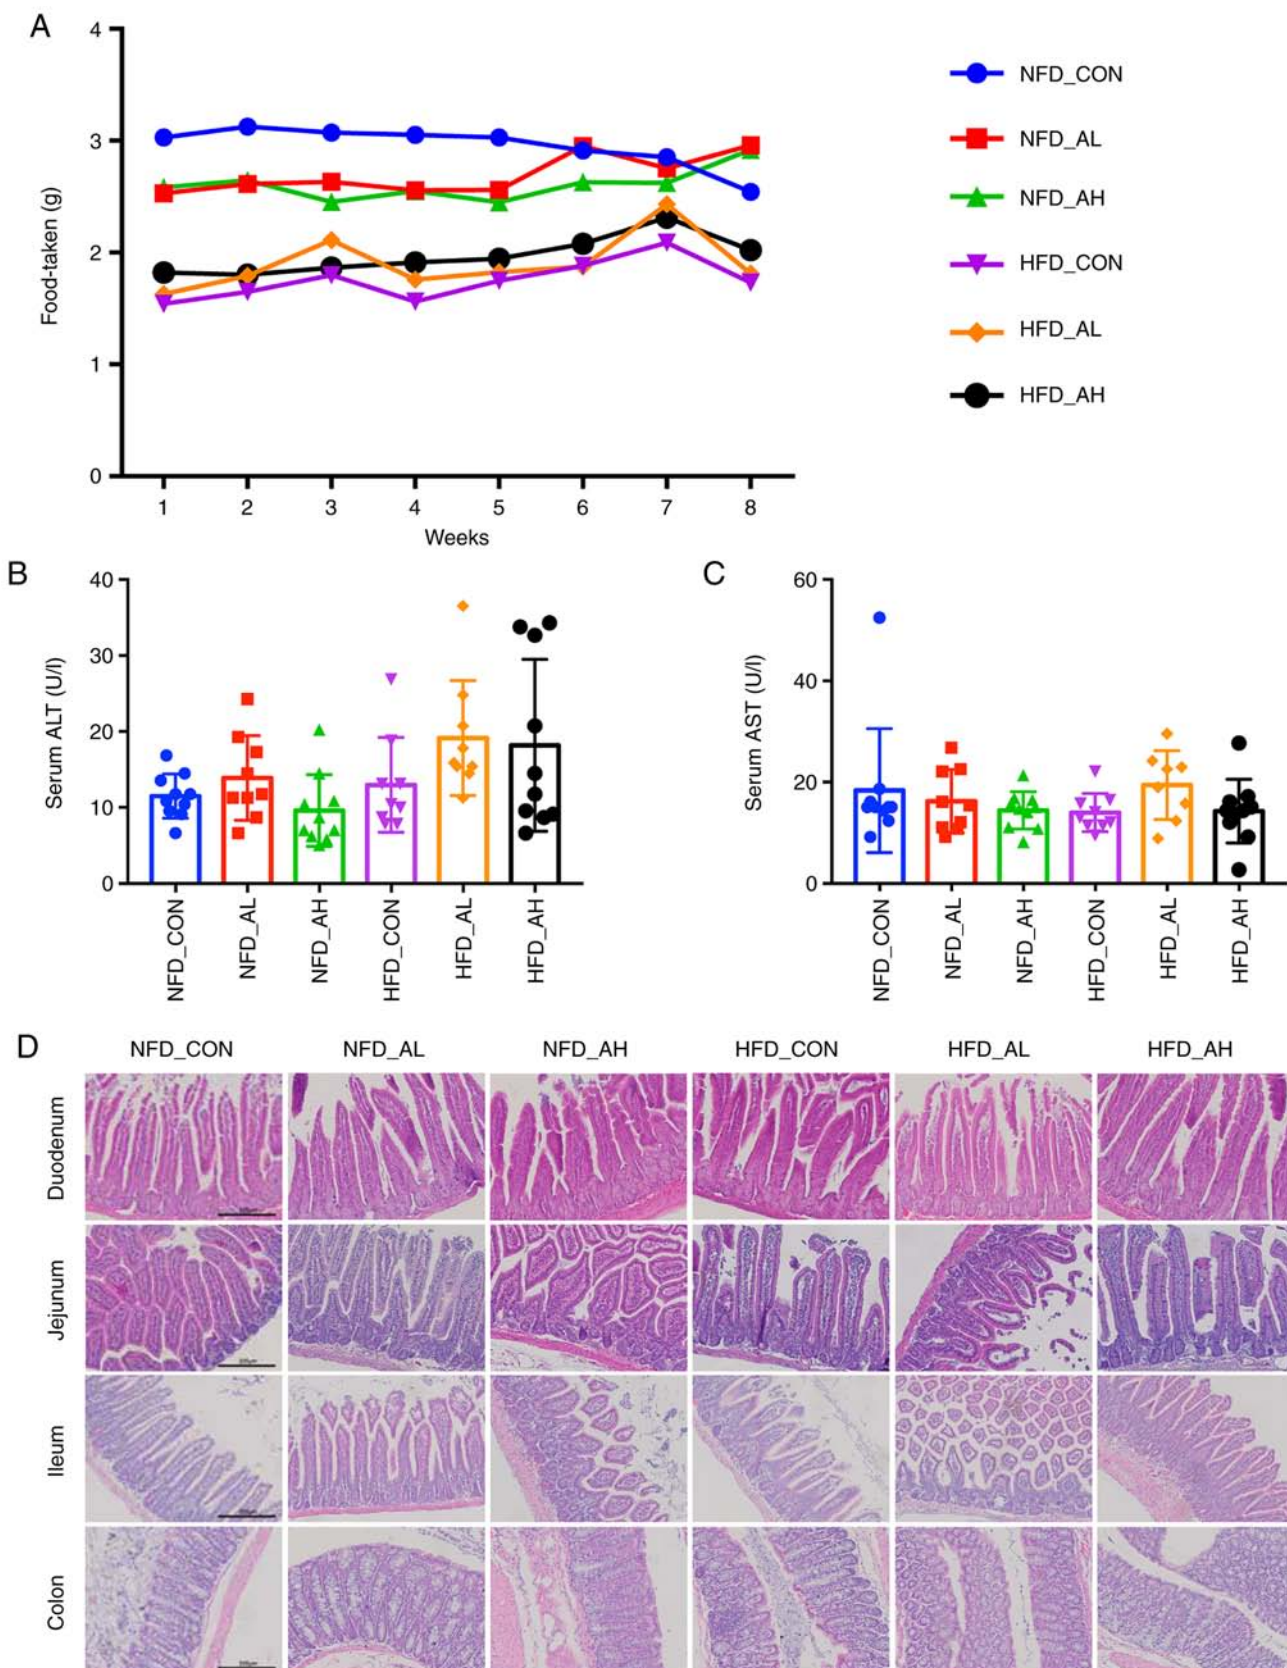

Figure S2. Expression of lipid metabolism-associated genes in the liver of the mice in the NFD groups. (A) mRNA expression levels of lipin 1, hepatic lipase, PNPLA2 and PGC-1 $\alpha$ . (B) mRNA expression levels of HNF4 $\alpha$ , CYP7A1 and FXR. (C) mRNA expression levels of Abcg5, CD36 and LDLR. \*P<0.05, \*\*P<0.01, \*\*\*P<0.001 vs. NFD-CON.

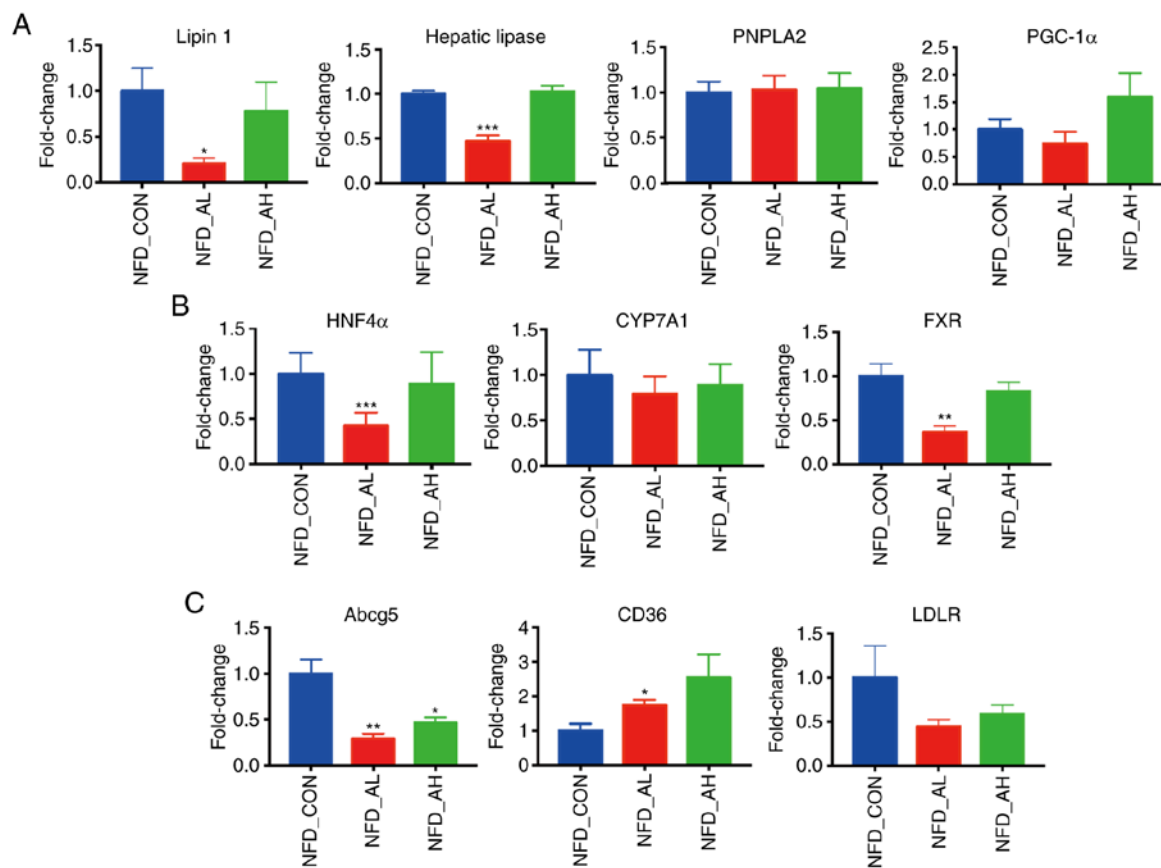

Figure S2. Continued. (D) mRNA expression levels of ACC $\alpha$ 1, ACC $\beta$ 1, Fasn, DGAT1, DGAT2, ELOVL5, SREBP-1, SREBP-2, HMGCoAR, PPAR $\gamma$  and SCD1. (E) mRNA expression levels of FGF4 $\alpha$ , FGF15 and FGF21. \* $P < 0.05$ , \*\* $P < 0.01$ , \*\*\* $P < 0.001$  vs. NFD-CON. NFD-CON, control mice fed with NFD; NFD-AL, mice fed with NFD and treated with a low dose of DADS; NFD-AH, mice fed with NFD and treated with a high dose of DADS. NFD, normal food diet; DADS, diallyl disulfide; PNPLA2, patatin-like phospholipase domain-containing protein 2; PGC-1 $\alpha$ , peroxisome proliferator-activated receptor  $\gamma$  coactivator-1 $\alpha$ ; HNF4 $\alpha$ , hepatocyte nuclear factor 4 $\alpha$ ; CYP7A1, cholesterol 7- $\alpha$  hydroxylase gene; FXR, farnesoid X receptor; Abcg5, adenosine triphosphate-binding cassette subfamily G members 5; LDLR, low density lipoprotein receptor; ACC $\alpha$ 1, acetyl-CoA carboxylase  $\alpha$ 1; ACC $\beta$ 1, acetyl-CoA carboxylase  $\beta$ 1; Fasn, fatty acid synthase; DGAT1, diacylglycerol acyltransferase 1; DGAT2, diacylglycerol acyltransferase 2; ELOVL5, elongases of very long-chain fatty acids 5; SREBP-1, sterol regulatory element-binding protein-1; SREBP-2, sterol regulatory element-binding protein-2; HMGCoAR, hydroxy-methyl-glutaryl coenzyme A reductase; PPAR $\gamma$ , peroxisome proliferator-activated receptor  $\gamma$ ; SCD1, Stearoyl-CoA desaturase-1; FGF4 $\alpha$ , fibroblast growth factor 4 $\alpha$ ; FGF15, fibroblast growth factor 15; FGF21, fibroblast growth factor 21.

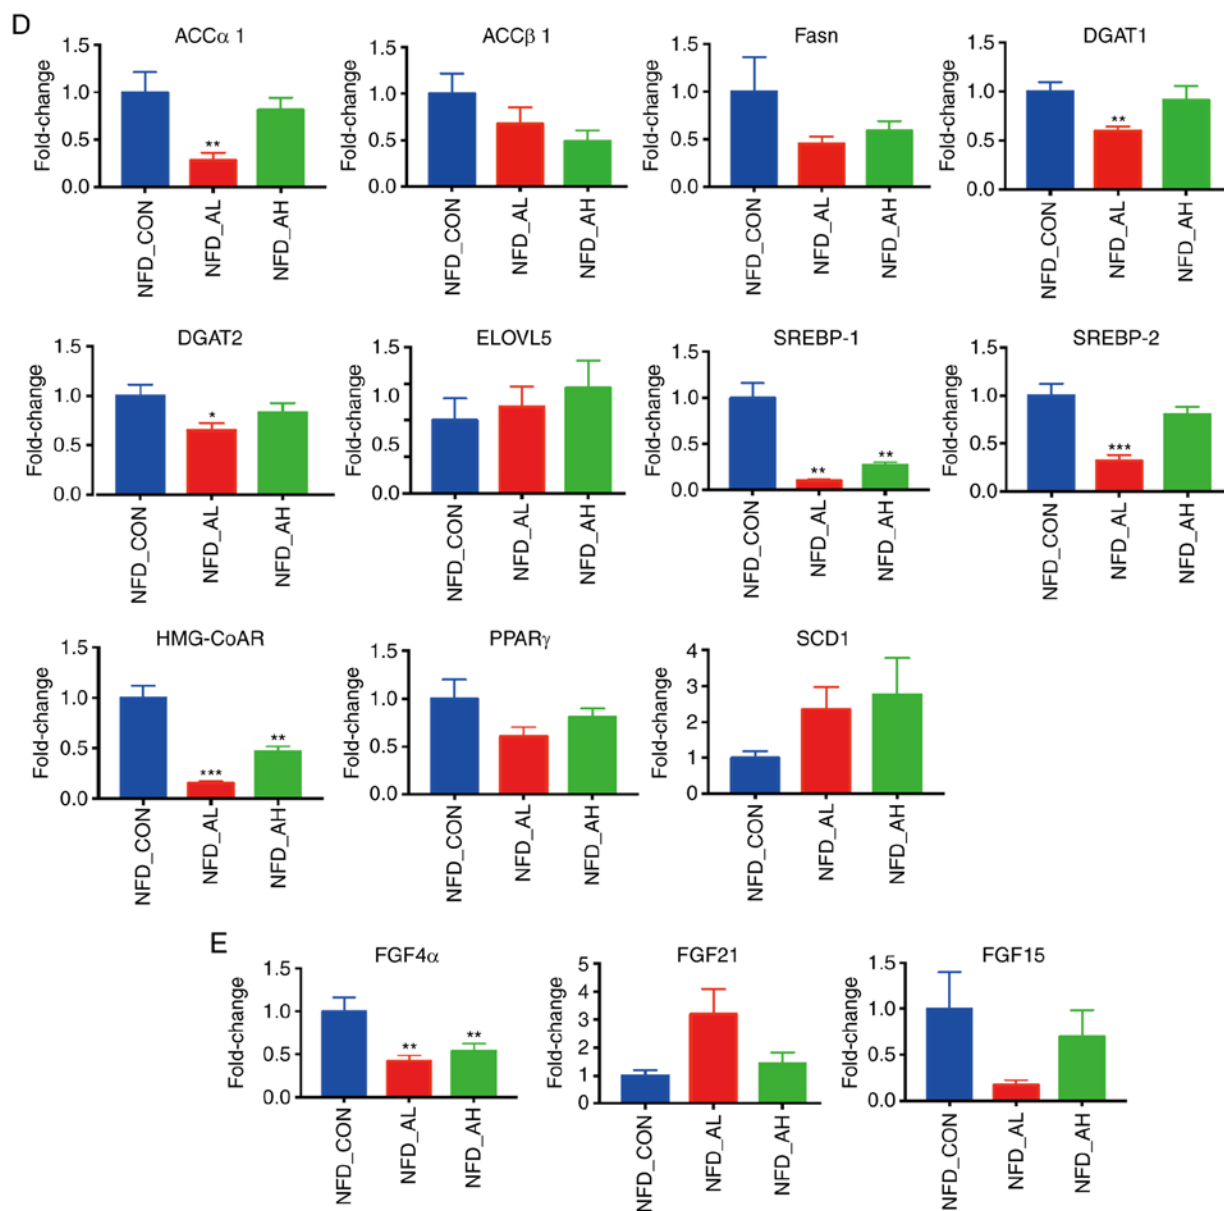

Figure S3. Shannon rarefaction curves and Venn diagram of different groups. (A) Shannon rarefaction curves of the different groups. (B-D) Venn diagrams of the different groups. NFD-CON, control mice fed with NFD; NFD-AL, mice fed with NFD and treated with low a dose of DADS; NFD-AH, mice fed with NFD and treated with a high dose of DADS; HFD-CON, control mice fed with HFD; HFD-AL, mice fed with HFD and treated with a low dose of DADS; HFD-AH, mice fed with HFD and treated with a high dose of DADS. NFD, normal food diet; HFD, high fat diet; DADS, diallyl disulfide.

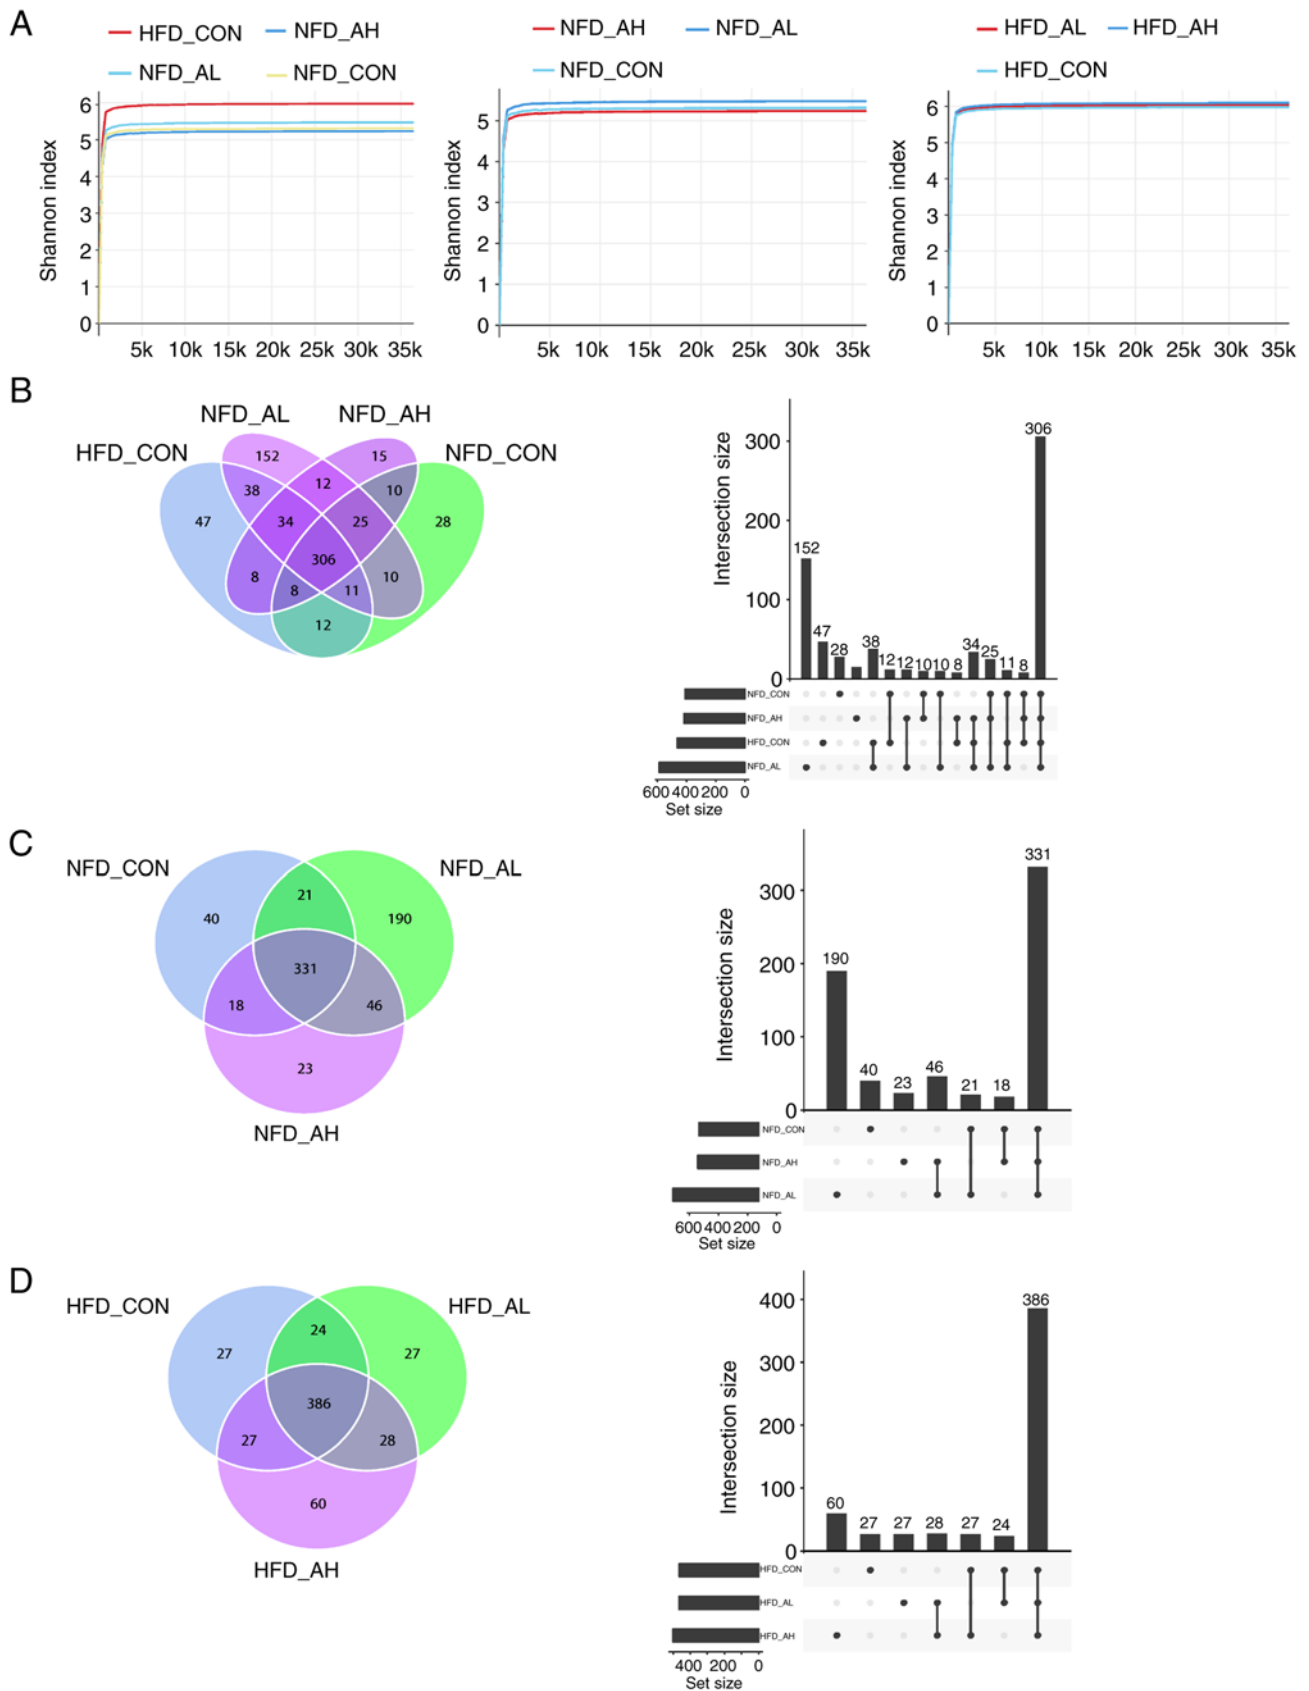

Figure S4. Unifrac analyses and relative composition of the gut microbiota in the 6 groups. (A and B) Unifrac analyses. (C and D) Relative composition of the gut microbiota at the bacterial phylum level. (E and F) Relative composition of the gut microbiota at the bacterial order level. \* $P < 0.05$  vs. NFD\_CON, # $P < 0.05$  vs. HFD\_CON. NFD-CON, control mice fed with NFD; NFD-AL, mice fed with NFD and treated with low a dose of DADS; NFD-AH, mice fed with NFD and treated with a high dose of DADS; HFD-CON, control mice fed with HFD; HFD-AL, mice fed with HFD and treated with a low dose of DADS; HFD-AH, mice fed with HFD and treated with a high dose of DADS. NFD, normal food diet; HFD, high fat diet; DADS, diallyl disulfide.

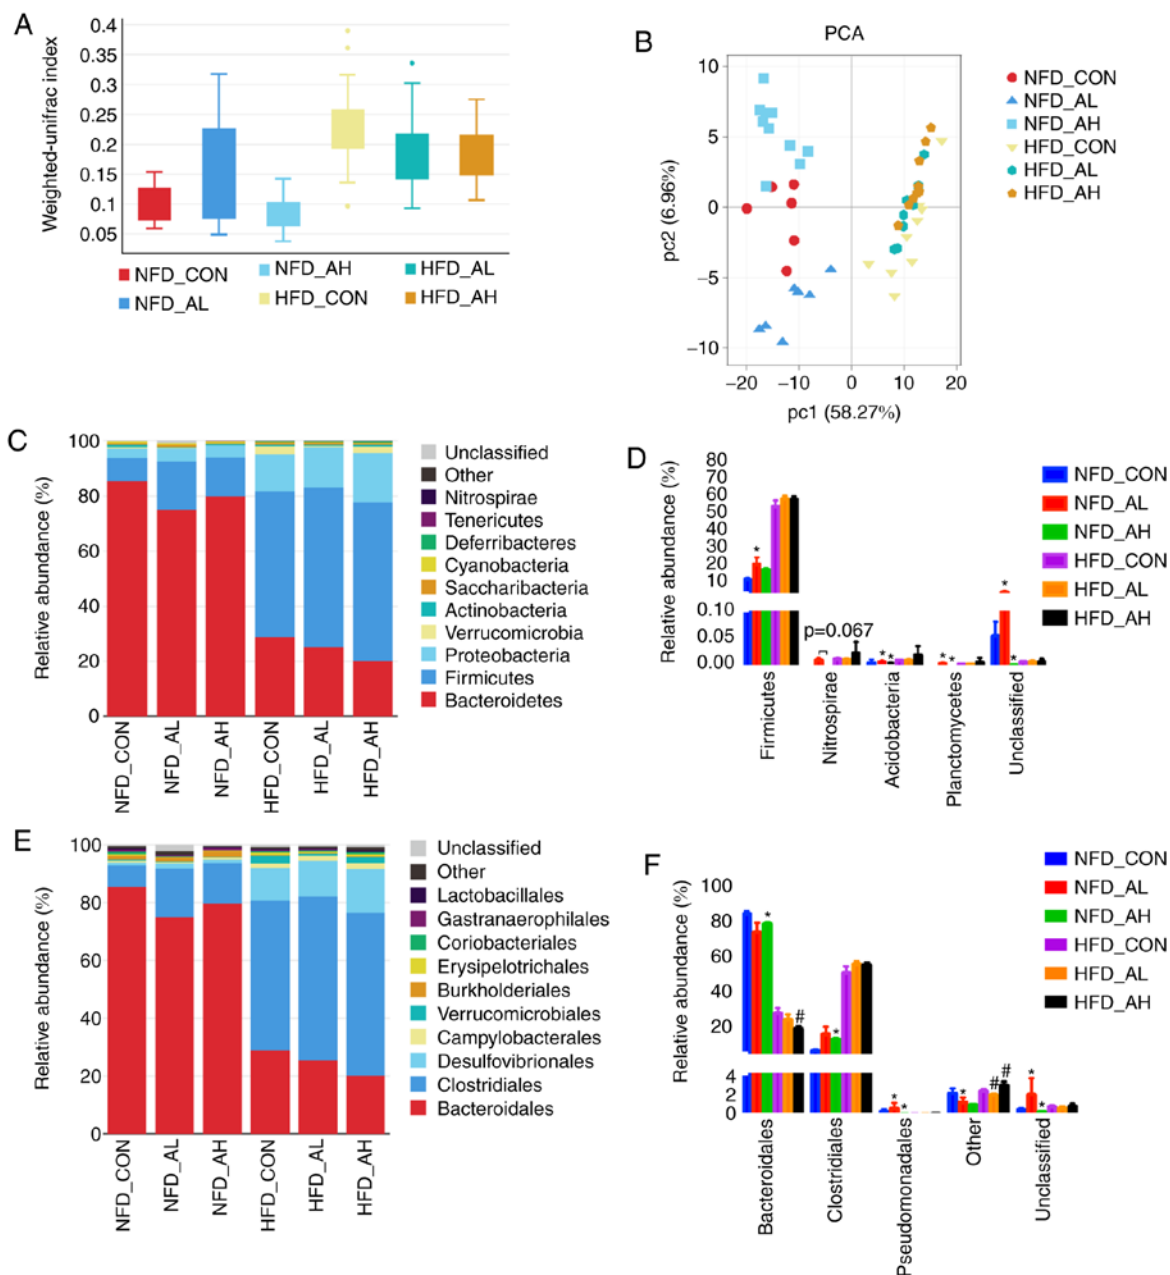



Figure S5. LEFse analysis of the different groups. (A and B) LEFse analysis of the NFD-CON, HFD-CON, HFD-AL and HFD-AH groups, red represents the bacteria specific for the HFD\_AH group, green represents the bacteria specific for the HFD\_AL group, blue represents the bacteria specific for the HFD\_CON group and purple represents the bacteria specific for NFD\_CON group. (C) Presentation of KEGG assignments of the altered pathways in the 6 groups. Red represents upregulation, and blue represents downregulation. (D and E) Association between fat, liver TG and TC, and the bacterial taxa. In D, different colors and shapes represent the bacteria of different groups. In E, different colors and shapes represent different factors. NFD-CON, control mice fed with NFD; NFD-AL, mice fed with NFD and treated with low a dose of DADS; NFD-AH, mice fed with NFD and treated with a high dose of DADS; HFD-CON, control mice fed with HFD; HFD-AL, mice fed with HFD and treated with a low dose of DADS; HFD-AH, mice fed with HFD and treated with a high dose of DADS. NFD, normal food diet; HFD, high fat diet; DADS, diallyl disulfide; TG, triglyceride; TC, total cholesterol; KEGG, Kyoto Encyclopedia of Genes and Genomes.

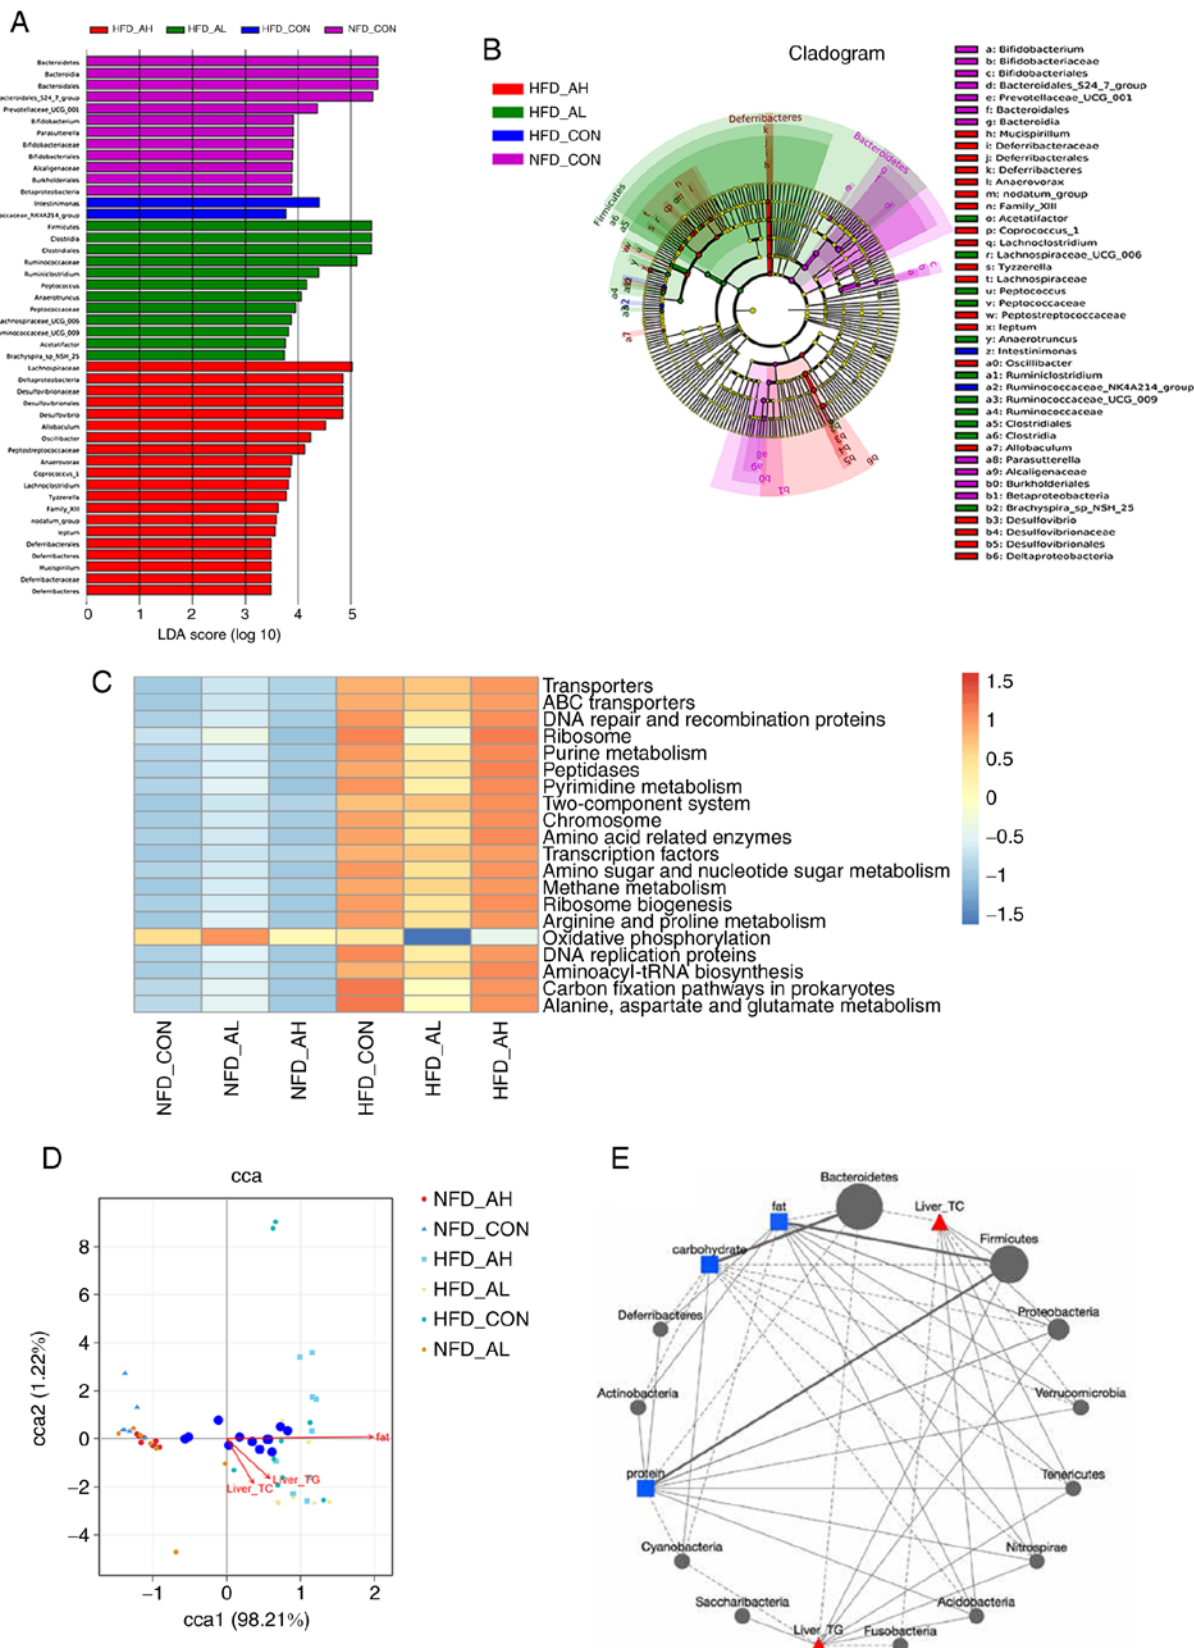

Table SI. Primer sequences of genes.

| Genes          | Forward (5' to 3')     | Reverse (5' to 3')      |
|----------------|------------------------|-------------------------|
| Lipin1         | CCCTGTATTTCCCAAGAATGG  | ATCTTTGGTGATCTCTCTGTGG  |
| Hepatic lipase | CTACAAACACATTGCAGAGCAT | GTTGCAAGGAGTCAATGAAGAG  |
| PNPLA2         | CAGAGATGGACTTCGATTCCTT | CAGGTGCTCTAGAATTCGATCT  |
| PGC-1 $\alpha$ | GGATATACTTTACGCAGGTCGA | CGTCTGAGTTGGTATCTAGGTC  |
| HNF4 $\alpha$  | TGAGGAAGAACCACATGTACTC | GTAACGACACTGGTTCCTCTTA  |
| CYP7A1         | GGGATTGCTGTGGTAGTGAGC  | GGTTATGGAATCAACCCGTTGT  |
| FXR            | TGGGTACAAGGGAGAGACTG   | CCCTGTCTCCACAGACAACA    |
| Abcg5          | CATTGAAAGAGCACGATACCTG | AGATTCTGAACGAGACGCATAA  |
| CD36           | CTTTGAAAGAACTCTTGTTGGG | GTCTGTGCCATTAATCATGTGC  |
| LDLR           | CAGAAGTCGACACTGTACTGAC | AAGATGGACAGGAACCTCATA   |
| ACC $\alpha$ 1 | GGCCAGTGATATGCTGAGAT   | AGGGTCAAGTGCTGCTCCA     |
| ACC $\beta$ 1  | GATGACAGTGTCAGTGGTTCAG | CTTGTCTGCTTCCATTAGCTTC  |
| Fasn           | TAAAGCATGACCTCGTGATGAA | GAAGTTCAGTGAGGCGTAGTAG  |
| DGAT1          | CCGATTCTTCCAAGGGAACAT  | ATCGTAGTTGAGCACGTAGTAG  |
| DGAT2          | GAAGTCAGCAAGAAGTTTCCTG | CACCACGATGATGATAGCATTG  |
| ELOVL5         | CTTCAGTTTGTGCTGACAATCA | AAGAGAGCAATCAGGGAAATCA  |
| SREBP-1        | GCTACCGGTCTTCTATCAATGA | CGCAAGACAGCAGATTTATTCA  |
| SREBP-2        | TTTTACTGAAGTAGAGCGGGTC | CATGCATGGCTCTACAGGTATA  |
| HMG-CoAR       | GGTGCAAAGTTCCTTAGTGATG | GAATAGACACACCACGTTTCATG |
| PPAR $\gamma$  | ATTCTGGCCCACCAACTTCGG  | TGGAAGCCTGATGCTTTATCCCA |
| SCD1           | AACATTCAATCCCGGGAGAATA | GAAACTTTCTCCGGTCGTAAG   |
| FGF4 $\alpha$  | GGTACGTGGACGGAGGAGTGAG | AGAGGCGGAGGCTGAGGTTG    |
| FGF15          | CTGTGTCAGATGAAGATCCACT | CAAATTCGTTTCGTTTTGGTCC  |
| FGF21          | AAGACACTGAAGCCCACCTG   | CACCCAGGATTTGAATGACC    |
| GAPDH          | GCATCCACTGGTGCTGCC     | TCATCATACTTGGCAGGTTTC   |

Table SII. Diversity estimation of the 16S rRNA gene library of the DADS and HFD treated mice from the sequencing.

| Groups    | Total tags | OTUs | Chao   | Ace    | Shannon | Simpson |
|-----------|------------|------|--------|--------|---------|---------|
| NFD_CON-1 | 59,580     | 358  | 436.12 | 411.37 | 5.41    | 0.95    |
| NFD_CON-2 | 73,924     | 368  | 437.38 | 436.37 | 4.72    | 0.90    |
| NFD_CON-3 | 81,442     | 404  | 489.00 | 482.17 | 4.98    | 0.93    |
| NFD_CON-4 | 74,654     | 408  | 471.00 | 459.13 | 5.65    | 0.96    |
| NFD_CON-5 | 62,723     | 359  | 432.09 | 416.30 | 5.40    | 0.95    |
| NFD_CON-6 | 70,823     | 358  | 401.97 | 399.88 | 5.73    | 0.96    |
| NFD_AL-1  | 59,628     | 349  | 434.02 | 436.16 | 4.85    | 0.91    |
| NFD_AL-2  | 58,944     | 430  | 546.92 | 514.09 | 5.11    | 0.92    |
| NFD_AL-3  | 57,641     | 449  | 591.74 | 574.49 | 5.65    | 0.95    |
| NFD_AL-4  | 71,157     | 423  | 587.36 | 555.81 | 5.44    | 0.96    |
| NFD_AL-5  | 80,814     | 498  | 591.14 | 567.27 | 5.73    | 0.95    |
| NFD_AL-6  | 77,122     | 541  | 644.11 | 635.15 | 6.31    | 0.97    |
| NFD-AL-7  | 49,562     | 349  | 408.29 | 397.16 | 5.24    | 0.94    |
| NFD_AH-1  | 50,020     | 368  | 415.88 | 429.67 | 5.45    | 0.95    |
| NFD_AH-2  | 66,806     | 397  | 468.15 | 455.89 | 5.04    | 0.92    |
| NFD_AH-3  | 60,537     | 399  | 436.13 | 436.20 | 5.65    | 0.96    |
| NFD_AH-4  | 80,508     | 391  | 480.02 | 479.11 | 5.04    | 0.93    |
| NFD_AH-5  | 66,724     | 400  | 448.07 | 448.13 | 5.14    | 0.93    |
| NFD-AH-6  | 93,466     | 426  | 479.33 | 468.25 | 5.17    | 0.93    |
| NFD_AH-7  | 64,386     | 412  | 493.28 | 471.90 | 5.24    | 0.94    |
| NFD_AH-8  | 67,041     | 443  | 505.57 | 495.66 | 5.51    | 0.95    |
| NFD_AH-9  | 78,870     | 419  | 486.53 | 475.29 | 5.04    | 0.92    |
| NFD_AH-10 | 83,566     | 392  | 436.63 | 443.71 | 5.09    | 0.92    |
| HFD_CON-1 | 69,724     | 453  | 571.32 | 565.14 | 5.52    | 0.95    |
| HFD-CON-2 | 57,756     | 479  | 576.23 | 559.72 | 6.58    | 0.98    |
| HFD-CON-3 | 64,033     | 476  | 578.10 | 560.40 | 5.79    | 0.95    |
| HFD_CON-4 | 72,607     | 487  | 578.54 | 556.38 | 6.19    | 0.97    |
| HFD_CON-5 | 66,040     | 445  | 552.76 | 529.25 | 5.73    | 0.96    |
| HFD_CON-6 | 66,457     | 437  | 547.25 | 555.91 | 6.37    | 0.98    |
| HFD_CON-7 | 56,954     | 458  | 553.23 | 545.70 | 6.13    | 0.97    |
| HFD_CON-8 | 63,061     | 457  | 524.23 | 519.92 | 5.60    | 0.92    |
| HFD_CON-9 | 64,366     | 437  | 495.09 | 496.89 | 5.96    | 0.96    |
| HFD_AL-1  | 43,696     | 451  | 553.10 | 535.41 | 6.42    | 0.97    |
| HFD_AL-2  | 63,623     | 480  | 557.29 | 575.66 | 5.60    | 0.94    |
| HFD_AL-3  | 60,243     | 487  | 566.73 | 579.19 | 6.09    | 0.96    |
| HFD_AL-4  | 77,522     | 485  | 557.85 | 576.20 | 5.75    | 0.95    |
| HFD_AL-5  | 63,648     | 486  | 590.34 | 568.64 | 6.09    | 0.96    |
| HFD_AL-6  | 96,448     | 486  | 594.02 | 580.74 | 5.87    | 0.96    |
| HFD_AL-7  | 57,478     | 466  | 549.00 | 536.34 | 6.31    | 0.97    |
| HFD_AL-8  | 63,360     | 513  | 598.00 | 583.60 | 6.63    | 0.98    |
| HFD_AL-9  | 57,146     | 473  | 638.09 | 589.43 | 6.17    | 0.97    |
| HFD_AH-1  | 57,586     | 434  | 493.00 | 470.78 | 6.07    | 0.95    |
| HFD-AH-2  | 72,798     | 444  | 513.39 | 479.95 | 5.92    | 0.94    |
| HFD_AH-3  | 64,143     | 432  | 475.50 | 472.60 | 5.76    | 0.94    |
| HFD_AH-4  | 79,085     | 574  | 635.42 | 609.77 | 6.21    | 0.96    |
| HFD_AH-5  | 84,149     | 455  | 510.03 | 490.35 | 5.91    | 0.94    |
| HFD_AH-6  | 66,166     | 428  | 481.93 | 485.54 | 6.18    | 0.97    |
| HFD_AH-7  | 67,278     | 404  | 441.12 | 442.80 | 6.27    | 0.97    |
| HFD_AH-8  | 66,941     | 420  | 453.28 | 456.50 | 6.13    | 0.97    |
| HFD_AH-9  | 53,865     | 386  | 442.00 | 439.34 | 5.92    | 0.96    |

NFD\_CON, the control mice fed with NFD; NFD\_AL, the mice fed with NFD and treated with low dosed DADS; NFD\_AH, the mice fed with NFD and treated with high dosed DADS; HFD\_CON, the control mice fed with HFD; HFD\_AL, the mice fed with HFD and treated with low dosed DADS; HFD\_AH, the mice fed with HFD and treated with high dosed DADS.
